# Supplementary material for: The conserved interaction of C7orf30 with MRPL14 promotes biogenesis of the mitochondrial large ribosomal subunit and mitochondrial translation
Source: PubMed Central journal article supplement — Mol Biol Cell. 2013 Feb 1;24(3):184–93. doi: 10.1091/mbc.E12-09-0651 (PMC3564531; doi:10.1091/mbc.e12-09-0651), 2013-02-01
Supplement: supp_E12-09-0651v1_CombinedSupMats.pdf [file supp_E12-09-0651v1_CombinedSupMats.pdf]

**Supplemental Table 1.** qRT-PCR analysis of the steady-state RNA levels for C7orf30, mitochondrial RNAs, and MRPL14.

| Sample name / Relative gene expression* | c7orf30 | ND1  | ND2  | ND3  | ND4/4L | ND5  | ND6  | cyt b | COXI | COXII | COXIII | ATP6/8 | 12S  | 16S  | MRPL14 |
|-----------------------------------------|---------|------|------|------|--------|------|------|-------|------|-------|--------|--------|------|------|--------|
| Control                                 | 1.00    | 1.00 | 1.00 | 1.00 | 1.00   | 1.00 | 1.00 | 1.00  | 1.00 | 1.00  | 1.00   | 1.00   | 1.00 | 1.00 | 1.00   |
| Control+c7orf30-FLAG                    | 35.5    | 1.19 | 1.26 | 1.06 | 1.13   | 1.01 | 1.03 | 0.98  | 0.96 | 1.00  | 1.03   | 1.05   | 0.97 | 0.91 | 1.03   |
| shRNA-A2-C2                             | 0.03    | 1.48 | 1.52 | 1.46 | 0.94   | 0.74 | 0.76 | 1.34  | 0.74 | 1.14  | 1.42   | 1.07   | 1.09 | 0.70 | 0.69   |
| shRNA-A2-C2+c7orf30-FLAG                | 0.71    | 0.82 | 1.01 | 0.92 | 0.74   | 0.80 | 0.70 | 0.80  | 0.72 | 0.78  | 0.78   | 0.82   | 0.70 | 0.58 | 0.63   |

\*Endogenous controls: GAPDH and ACTB

**Supplemental Table 2.** LC/MS/MS analysis of eluates from anti-FLAG immunoprecipitation experiments using mitochondrial extracts from HEK293 cells expressing C7orf30-FLAG as input, with or without DSG-cross-linking.

| LC/LC/MS Analysis of DSG-CLIP of C7orf30-FLAG |                       |                       |                       |
|-----------------------------------------------|-----------------------|-----------------------|-----------------------|
|                                               | DSG-CLIP Experiment 1 | DSG-CLIP Experiment 2 | DSG-CLIP Experiment 3 |
| C7orf30                                       | 386                   | 486                   | 460                   |
| MRPL14                                        | 377                   | 428                   | 295                   |
| MRPS18c                                       | 65                    | 121                   | 90                    |
| MRPL17                                        | 147                   | 278                   | N/A                   |
| MRPS21                                        | N/A                   | 85                    | 73                    |
| MRPL15                                        | N/A                   | 132                   | 78                    |
| MRPS2                                         | N/A                   | 44                    | 42                    |

| LC/LC/MS Analysis of DSP-CLIP of C7orf30-FLAG |              |                 |
|-----------------------------------------------|--------------|-----------------|
| Mitochondrial Ribosomal Protein               | Sample Score | Queries Matched |
| C7orf30                                       | 124          | 4               |
| ICT1                                          | 125          | 3               |
| MRPL14                                        | 320          | 15              |
| MRPL15                                        | 320          | 8               |
| MRPL9                                         | 290          | 15              |
| MRPL53                                        | 287          | 19              |
| MRPL43                                        | 281          | 14              |
| MRPL13                                        | 275          | 15              |
| MRPS27                                        | 216          | 6               |
| MRPL38                                        | 212          | 11              |
| MRPL21                                        | 191          | 12              |
| MRPS28                                        | 182          | 8               |
| MRPS9                                         | 179          | 6               |
| MRPS17                                        | 178          | 5               |
| MRPS22                                        | 168          | 5               |
| MRPL50                                        | 139          | 12              |
| MRPL28                                        | 139          | 5               |
| MRPS34                                        | 136          | 9               |
| MRPS29                                        | 135          | 4               |
| MRPL10                                        | 122          | 4               |
| MRPL16                                        | 112          | 5               |
| MRPL46                                        | 112          | 5               |
| MRPL41                                        | 108          | 5               |
| MRPS18b                                       | 99           | 4               |
| MRPS26                                        | 93           | 7               |
| MRPS18a                                       | 81           | 4               |
| MRPL3                                         | 69           | 3               |
| MRPL54                                        | 58           | 4               |
| MRPS12                                        | 55           | 4               |
| MRPL55                                        | 50           | 1               |
| MRPL27                                        | 40           | 2               |
| MRPS5                                         | 38           | 2               |
| MRPS14                                        | 36           | 2               |
| MRPL34                                        | 33           | 1               |

LC/LC/MS: anti-FLAG IP : FLAG elution

| Protein ID | Experiment 1 |                 | Experiment 2 |                 | Experiment 3 |                 |
|------------|--------------|-----------------|--------------|-----------------|--------------|-----------------|
|            | Score        | Queries Matched | Scores       | Queries Matched | Scores       | Queries Matched |
| C7orf30    | 640          | 94              | 347          | 45              | 484          | 59              |
| MRPL14     | 164          | 9               | 192          | 9               | 68           | 3               |

LC/LC/MS: DSG-X-link anti-FLAG IP : FLAG elution

| Protein ID | Experiment 1 |                 | Experiment 2 |                 | Experiment 3 |                 |
|------------|--------------|-----------------|--------------|-----------------|--------------|-----------------|
|            | Score        | Queries Matched | Scores       | Queries Matched | Scores       | Queries Matched |
| C7orf30    | 386          | 32              | 486          | 50              | 460          | 34              |
| MRPL14     | 377          | 17              | 428          | 22              | 295          | 10              |

LC/LC/MS: DSG-X-link anti-FLAG IP : glycine elution

| Protein ID | Experiment 1 |                 |
|------------|--------------|-----------------|
|            | Score        | Queries Matched |
| C7orf30    | 124          | 4               |
| MRPL14     | 320          | 15              |
| MRPL15     | 320          | 8               |
| MRPL9      | 290          | 15              |
| MRPL53     | 287          | 19              |
| MRPL43     | 281          | 14              |
| MRPL13     | 275          | 15              |
| MRPS27     | 216          | 6               |
| MRPL38     | 212          | 11              |
| MRPL21     | 191          | 12              |
| MRPS28     | 182          | 8               |
| MRPS9      | 179          | 6               |
| MRPS17     | 178          | 5               |
| MRPS22     | 168          | 5               |
| MRPL50     | 139          | 12              |
| MRPL28     | 139          | 5               |
| MRPS34     | 136          | 9               |
| MRPS29     | 135          | 4               |
| ICT1       | 125          | 3               |
| MRPL10     | 122          | 4               |
| MRPL16     | 112          | 5               |
| MRPL46     | 112          | 5               |
| MRPL24     | 109          | 7               |
| MRPL41     | 108          | 5               |
| MRPS18b    | 99           | 4               |
| MRPS26     | 93           | 7               |
| MRPS18a    | 81           | 4               |
| MRPL3      | 69           | 3               |
| MRPL54     | 58           | 4               |
| MRPS12     | 55           | 4               |
| MRPL55     | 50           | 1               |

LC/LC/MS: DSG-X-link anti-FLAG IP : glycine elution

| C7orf30 | Experiment 1 |                 |
|---------|--------------|-----------------|
|         | Score        | Queries Matched |
| C7orf30 | 124          | 4               |
| MRPL14  | 320          | 15              |
| MRPL15  | 320          | 8               |
| MRPL9   | 290          | 15              |
| MRPL53  | 287          | 19              |
| MRPL43  | 281          | 14              |
| MRPL13  | 275          | 15              |
| MRPS27  | 216          | 6               |
| MRPL38  | 212          | 11              |
| MRPL21  | 191          | 12              |
| MRPS28  | 182          | 8               |
| MRPS9   | 179          | 6               |
| MRPS17  | 178          | 5               |
| MRPS22  | 168          | 5               |
| MRPL50  | 139          | 12              |
| MRPL28  | 139          | 5               |
| MRPS34  | 136          | 9               |
| MRPS29  | 135          | 4               |
| ICT1    | 125          | 3               |
| MRPL10  | 122          | 4               |
| MRPL16  | 112          | 5               |
| MRPL46  | 112          | 5               |
| MRPL24  | 109          | 7               |
| MRPL41  | 108          | 5               |
| MRPS18b | 99           | 4               |
| MRPS26  | 93           | 7               |
| MRPS18a | 81           | 4               |
| MRPL3   | 69           | 3               |
| MRPL54  | 58           | 4               |
| MRPS12  | 55           | 4               |
| MRPL55  | 50           | 1               |
